# Supplementary material for: Transdermal thiol–acrylate polyethylene glycol hydrogel synthesis using near infrared light
Source: Royal Society of Chemistry journal article supplement (doi:10.1039/c6nr01956k), 2016-01-01
Supplement: c6nr01956k1.pdf [file c6nr01956k1.pdf]

Electronic Supplementary Information (ESI)

# Transdermal Thiol-Acrylate Polyethylene Glycol Hydrogel Synthesis Using Near Infrared Light †

*Solchan Chung<sup>a</sup>, Hwangjae Lee<sup>a</sup>, Min-Gon Kim<sup>b</sup>, Hyung-Seok Kim<sup>c</sup>, Luke P. Lee<sup>d</sup>, and Jae  
Young Lee<sup>a,e\*</sup>*

<sup>a</sup>School of Materials Science and Engineering, Gwangju Institute of Science and Engineering,  
Gwangju 500-712, South Korea

<sup>b</sup>Department of Chemistry, Gwangju Institute of Science and Engineering, Gwangju 500-712,  
South Korea

<sup>c</sup>Department of Forensic Medicine, Chonnam National University Medical School, Gwangju  
501-747, South Korea

<sup>d</sup>Department of Bioengineering, Berkeley Sensor and Actuator Center, University of California  
Berkeley, Berkeley, CA 94720-1762, USA

<sup>e</sup>Department of Biomedical System Engineering, Gwangju Institute of Science and Engineering,  
Gwangju 500-712, South Korea

**Contents:**

**Table S1.** Compositions of precursor solutions

**Figure S1.** SEM image of thiol-acrylate hydrogel.

**Figure S2.** Quantitative analysis of free thiol groups in the polymer solution by Ellman's assay.

**Figure S3.** Temperature increase at injection site during transdermal photothermal hydrogelation.

**Figure S4.** In Vitro degradation of thiol-acrylate hydrogels.

**Table S1.** Compositions of precursor solutions with different concentrations and their [SH]/[acryl] ratios

| [SH] / [acryl] | [PEGDA] | [PEG4SH] | [PEG4Ac] |
|----------------|---------|----------|----------|
| 0              | 8%      | 0%       | 10%      |
| 0.1            | 8%      | 2.7%     | 7.3%     |
| 0.25           | 8%      | 6%       | 4%       |
| 0.4            | 8%      | 8.6%     | 1.4%     |
| 0.5            | 8%      | 10%      | 0%       |

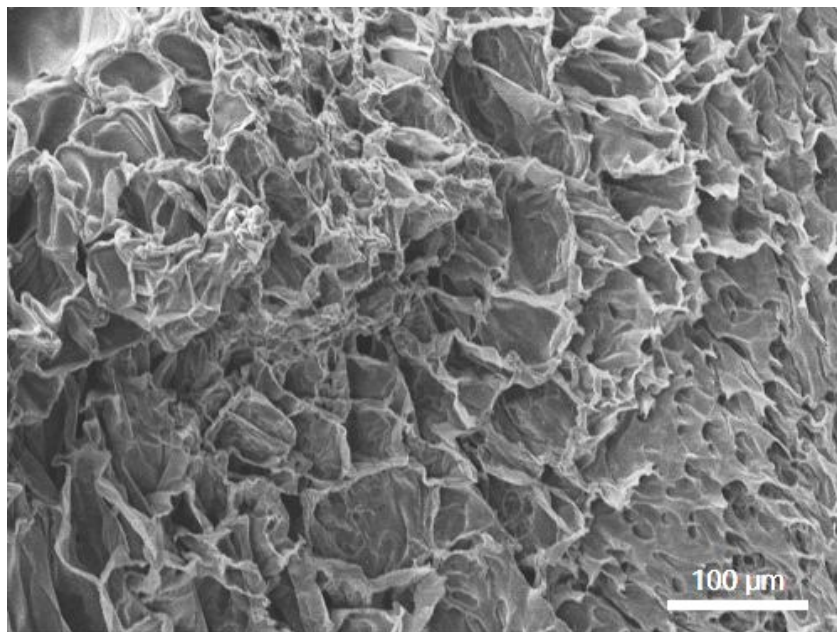

**Figure S1.** SEM image of freeze dried thiol-acrylate hydrogel. Hydrogel was prepared by irradiating  $0.3 \text{ W/cm}^2$  of NIR light for 10 min upon the precursor solution consisting of 8% PEGDA, 10% PEG4SH, 1 nM GNR-PEG, and 1% AIPH.

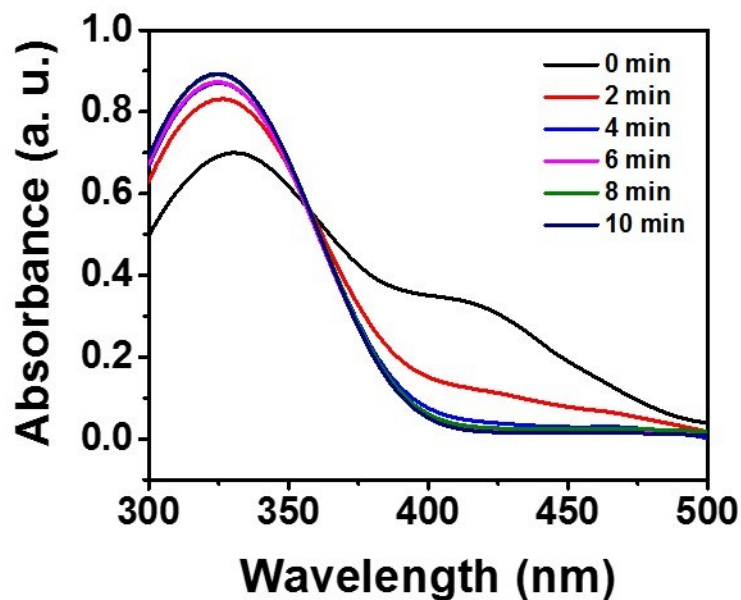

**Figure S2.** Quantitative analysis of free thiol groups in the polymer solution by Ellman's assay. Thiol-acrylate PEG solutions were irradiated with  $0.3 \text{ W/cm}^2$  785 nm laser for different time periods. The samples were mixed with the Ellman's reagent that readily reacts with free thiol groups, and then measured using a UV/Vis spectrometer. Absorbance peak intensities at 412 nm indicates amount of free thiol groups in the solution.

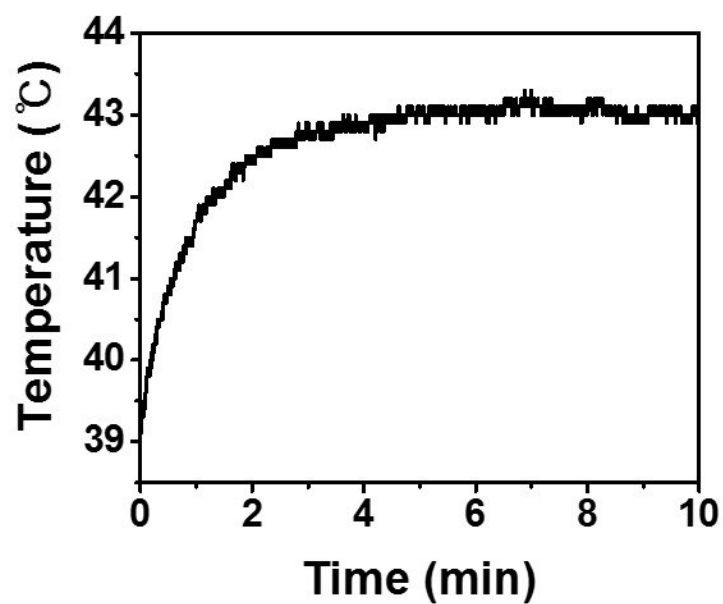

**Figure S3.** Temperature increase at injection site during transdermal photothermal hydrogelation. Injected precursor solution consists 8% PEGDA, 10% PEG4SH, 1 nM GNR-PEG, 1% AIPH, and 0.1 mM fluorescein o-acrylate. Upon the injection site, 0.4W/cm<sup>2</sup> of 785 nm NIR laser was irradiated for 10 min.

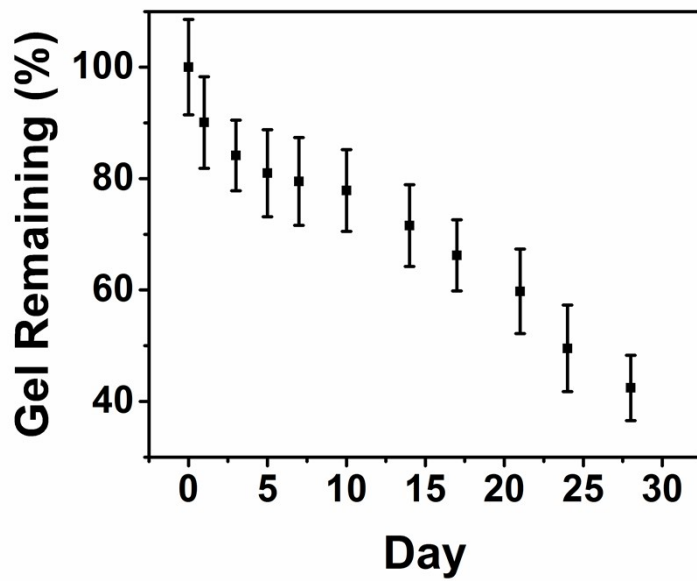

**Figure S4.** In Vitro degradation of thiol-acrylate hydrogels. Precursor solutions including 8% PEGDA, 10% PEG4SH, 1 nM GNR-PEG, and 1% AIPH in PBS (pH 7.4) were irradiated with 0.3 W/cm<sup>2</sup> of NIR light for 10 min to synthesize thiol-acrylate hydrogels. Hydrogels were put into petri dish filled with PBS (pH 7.4). Inside a 37°C incubating shaker, the petri dish was shook with 50 rpm for 4 weeks. After soaking up PBS on the surface of hydrogel, weight was measure from time to time. n=6.
